# Supplementary material
Source: PubMed Central journal article supplement (PMC7875093)
Supplement: NIHMS1664916-supplement-Supplementary_Materials_and_Methods__Figures_and_Tables.pdf [file NIHMS1664916-supplement-Supplementary_Materials_and_Methods__Figures_and_Tables.pdf]

## **Supplementary Materials**

### **Unstable genome and transcriptome dynamics during tumor metastasis contribute to therapeutic heterogeneity in colorectal cancers**

Sung-Yup Cho, Jeosoo Chae, Deukchae Na, Wonyoung Kang, Ahra Lee, Seoyeon Min, Jinjoo Kang, Boram Choi, Jieun Lee, Chang Ohk Sung, Jeffrey H. Chuang, Charles Lee, Won-Suk Lee, Hansoo Park, and Jong-Il Kim

S.-Y. Cho and J. Chae contributed equally to this article.

C. Lee, W.-S. Lee, H. Park and J.-I. Kim are considered co-senior authors.

Correspondence and requests for materials should be addressed to W.-S.L. (email: [lws@gilhospital.com](mailto:lws@gilhospital.com)), to H.P. (email: [hspark27@gist.ac.kr](mailto:hspark27@gist.ac.kr)) or to J.-I.K. (email: [jongil@snu.ac.kr](mailto:jongil@snu.ac.kr))

## **Supplementary Materials and Methods**

### **DNA preparation, exome capture, library construction and sequencing**

Genomic DNAs were extracted from patient blood using the Genra Puregene Blood Kit (Qiagen) and the tumor DNA was obtained from patients and PDX tumors using the DNeasy Blood & Tissue Kit (Qiagen). The 250 ng of DNA was sonicated with Covaris S220 Focusedultrasonicators and 101 bp paired-end libraries were constructed with the SureSelect All Exon V5 kit (Agilent). Whole exome sequencing (WES) was performed on an Illumina HiSeq 2000 instrument.

### **RNA preparation, library construction and RNA sequencing**

RNA extraction from non-tumor tissues, patients and PDX tumors was performed using TRIzol™ (Invitrogen). Samples with RNA integrity number (RIN) of greater than 5 were further processed. The 101 bp paired-end libraries were constructed with the TruSeq RNA Sample Prep Kit v2 (Illumina) using 1 µg of RNA. Whole transcriptome sequencing (WTS) was performed on an Illumina HiSeq 2000 instrument.

### **Droplet Digital PCR (ddPCR)**

The extracted genomic DNA was restricted with EcoRI (New England Biolabs) enzyme for 1 hr at 37°C. The PCR mixture was assembled in 20 µL solution containing 1X ddPCR supermix (Bio-Rad), 1X probe and primer premix for determining wild-type and mutant genes (ERBB2 L755S; final concentration of 250 nM for probe and 900 nM for each primer; Applied Biosystems), and 10 ng of the restricted DNA. The reaction mixture and droplet generation oil (Bio-Rad) were loaded into the droplet generator (QX-200; Bio-Rad). The droplets were transferred to a 96-well PCR plate and PCR reaction was performed as follows: enzyme activation for 10 min at 95°C, 40 cycles of 94°C for 30 sec, 60°C for 1 min, and 98°C for 10

min, followed by enzyme deactivation for 10 min at 98°C and 4°C hold (performed with a ramp rate of 2°C/sec in all steps). The PCR plate was placed in a droplet reader (Bio-Rad). After the reading, the allele frequencies of mutant genes were analyzed by Quanta software (Bio-Rad) accompanied by the droplet reader.

## **Cell culture**

HEK-293 cells were obtained from the Korean Cell Line Bank in 2014 and maintained in DMEM medium (Thermo Fisher Scientific) containing 10% fetal bovine serum (Thermo Fisher Scientific). The characteristics of cells were tested and authenticated by Korean Cell Line Bank, and cells in early passages were used for experiment to minimize genetic changes. Penicillin (100 U/ml; Thermo Fisher Scientific) and streptomycin sulfate (100 µg/ml; Thermo Fisher Scientific) were supplemented to all cell culture media. All cells were maintained in a humidified incubator with 5% CO<sub>2</sub> at 37°C.

## **Site-directed mutagenesis and transfection of DNA**

For recombinant DNA, physical and biologic containment procedures were practiced, in accord with the National Institutes of Health Guidelines for Research Involving Recombinant DNA Molecules. The QuickChange site-directed mutagenesis kit (Stratagene) was used to make point mutations, and the resulting mutations were verified by Sanger sequencing. The primers used in constructing the point mutations were as follows (the underlined sequences indicate the mutated bases): *TP53* A159V, 5'- CCCGCGTCCGCGTCATGGCCATCTAC -3' and *TP53* R273C, 5'- GAACAGCTTTGAGGTGTGCGTTTGTGCCTGTCCTG -3'. Transfection experiments were performed using the Lipofectamine 2000 Transfection kit according to manufacturer's recommendations (Thermo Fisher Scientific). After 48 hr, cells were harvested for cell viability assays in the presence of the selected drug.

### **Cell viability assay**

For the cell viability assays, about 5,000 cells were placed in 96-well plates, treated with indicated drugs for 72 h and cell viabilities estimated using the EzCyttox WST assay kit according to the manufacturer's instructions (Daeil Lab).

### **Quantitative real-time PCR**

Total RNA was purified using the RNeasy Plus Mini Kit according to manufacturer's instructions (Qiagen). One microgram of total RNA was transcribed into cDNA using the Maxime RT PreMix (Intron Biotechnology) for 1 hr at 45°C. Quantitative real-time PCR was performed using SYBR Green PCR Master Mix (Applied Biosystems). Glyceraldehyde 3-phosphate dehydrogenase (*GAPDH*) was used as internal control for normalization. The sequences of primers for vimentin were 5'- CCAAACCTTTTCCTCCCTGAACC -3' and 5'- GTGATGCTGAGAAGTTTCGTTGA -3', and the sequences for *GAPDH* were 5'- CGCTCTCTGCTCCTCCTGTT -3' and 5'- CCATGGTGTCTGAGCGATGT -3'.

### **Western blot analysis**

Cells were lysed in RIPA buffer (Thermo Fisher Scientific), and then centrifuged at 20,000 g for 10 min at 4°C. After determination of protein concentration in the cell extract by the bicinchoninic acid assay (Thermo Scientific), 20 µg of protein were resolved by SDS-PAGE and transferred to a polyvinyl difluoride membrane. Membranes were blocked for 1 hr with 5% skim milk in Tris-buffered saline and then incubated with an anti-Myc tag (Cell Signaling Technology) and an anti-Actin (Sigma-Aldrich Corporation) antibody. The membranes were washed and incubated with horseradish peroxidase-conjugated secondary antibody, followed by enhanced chemiluminescence development.

## **Statistics**

Statistical calculations were performed using Prism 4.0 (GraphPad). Differences between two variables were assessed by unpaired Student's *t* test. The difference was considered significant if the *P* value was less than 0.05.

# Supplementary Figures

## A

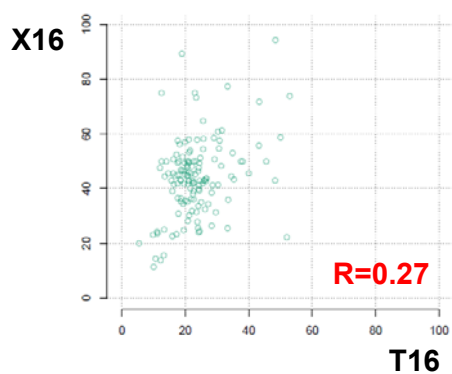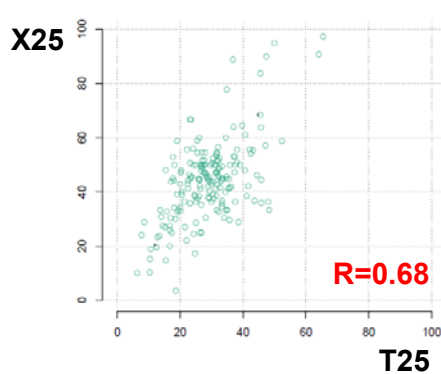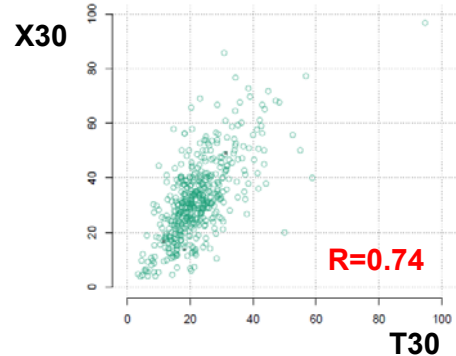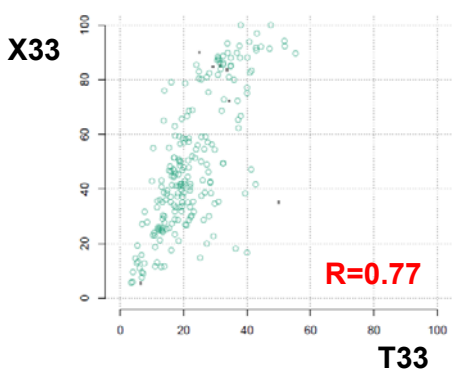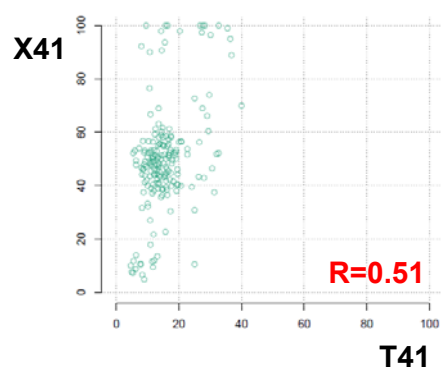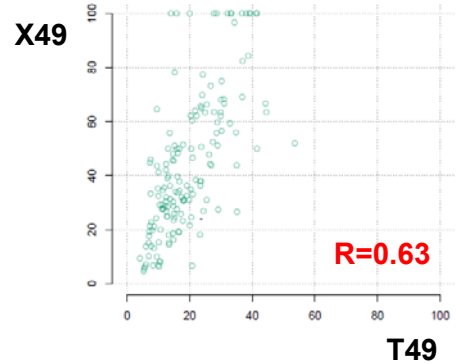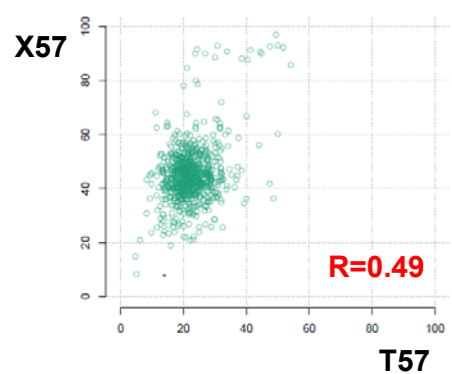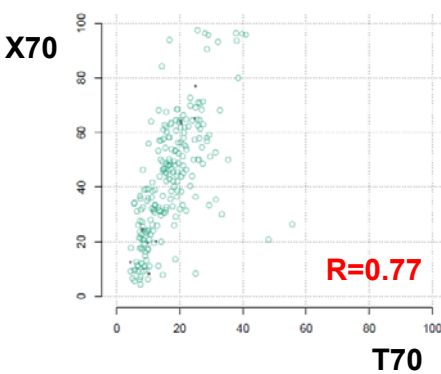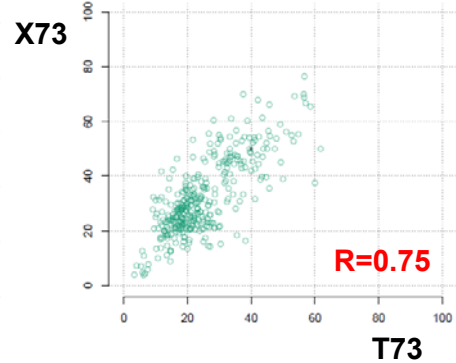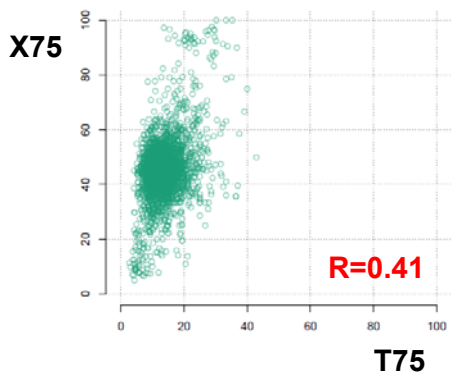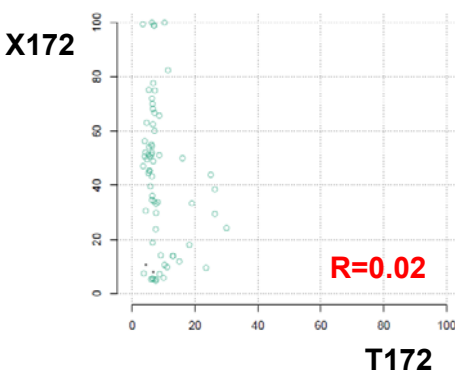

**B**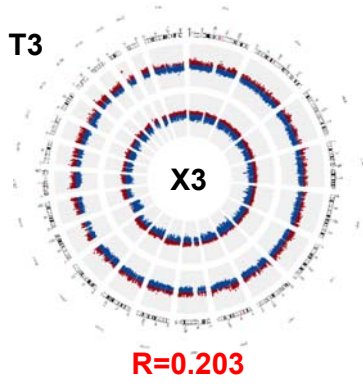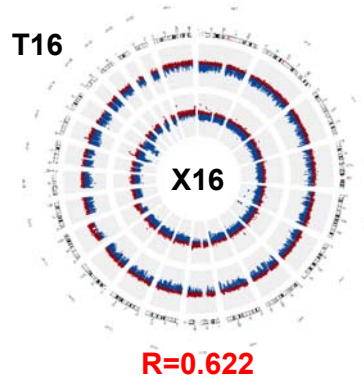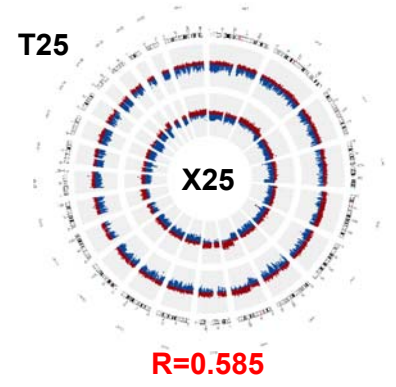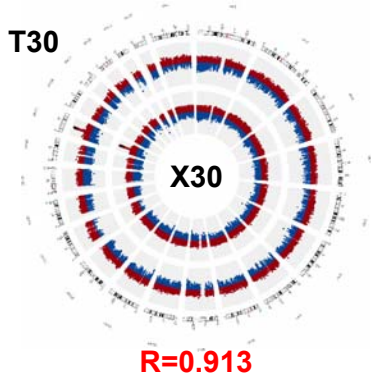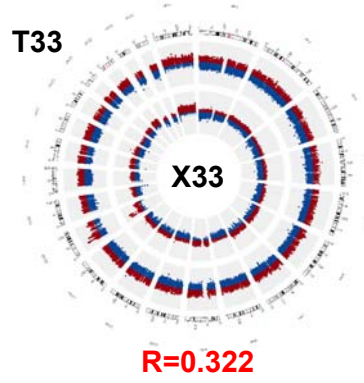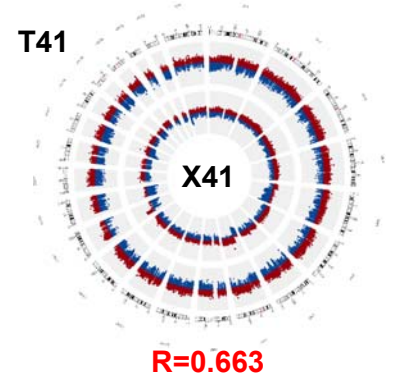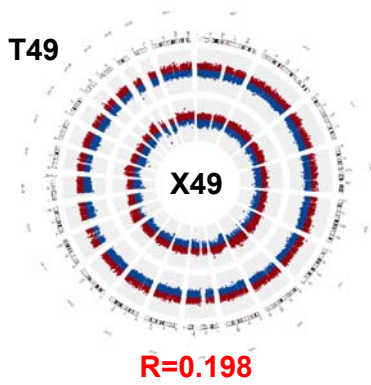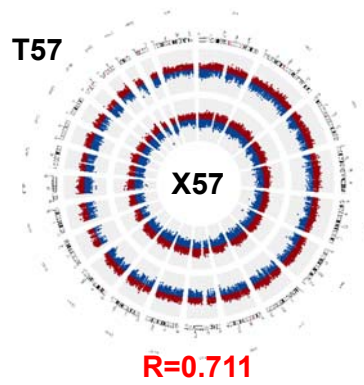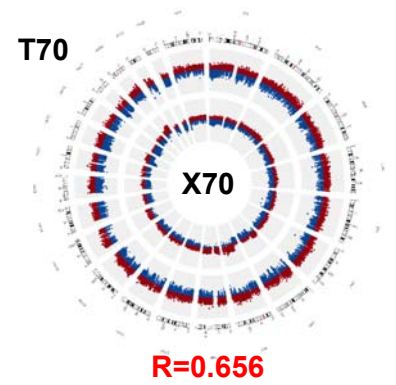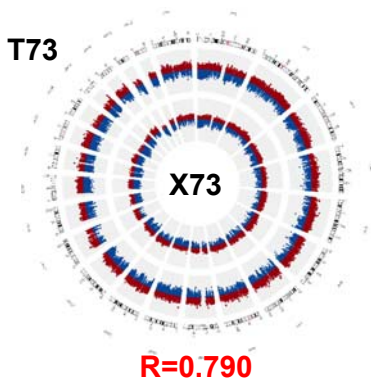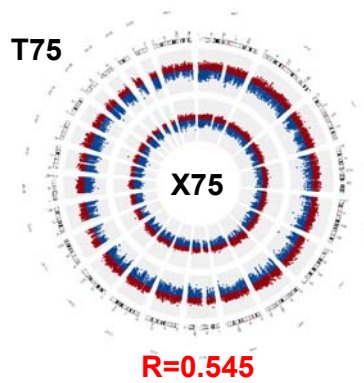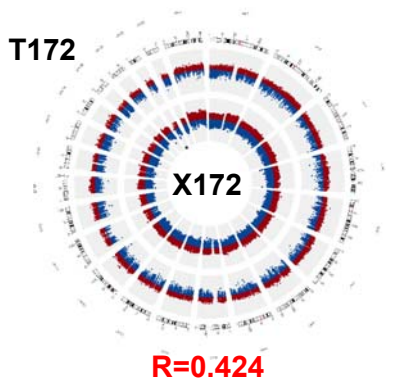

**C**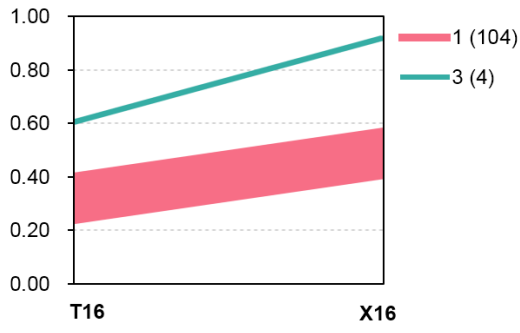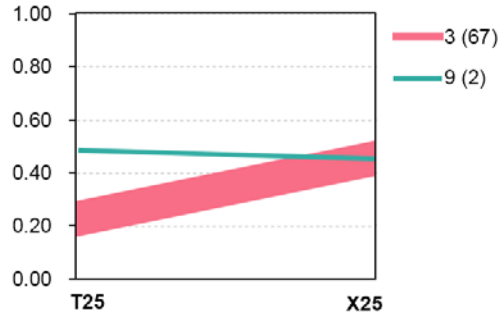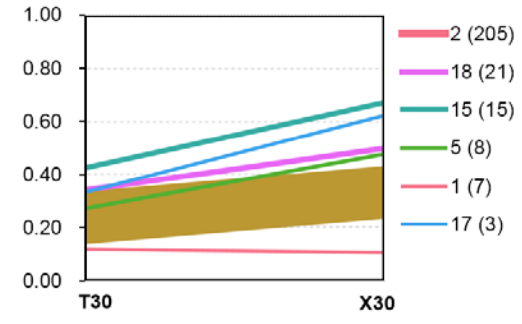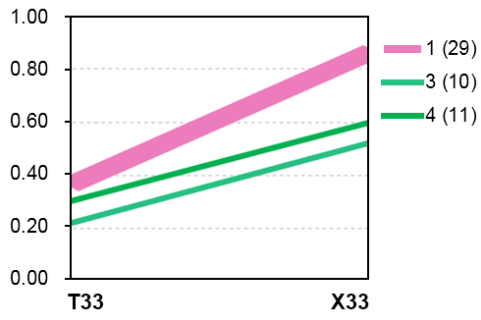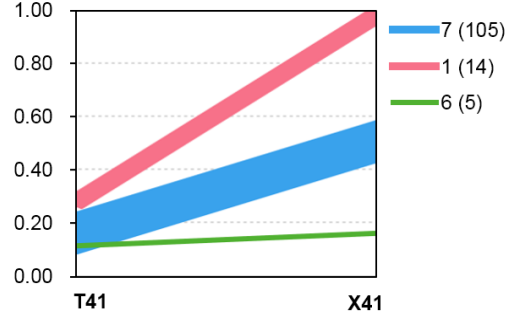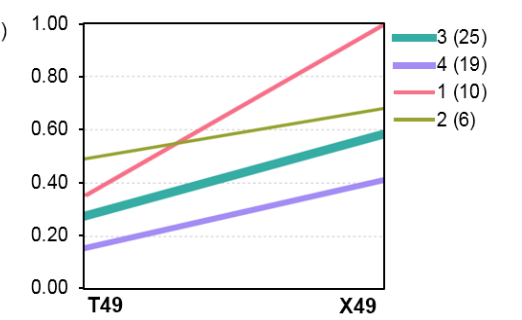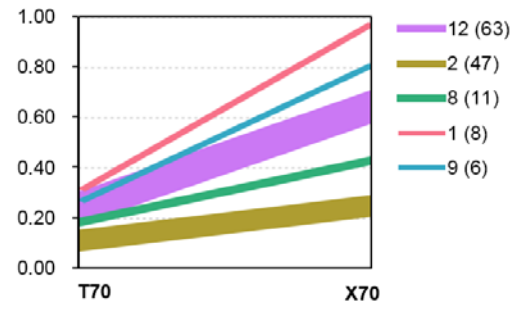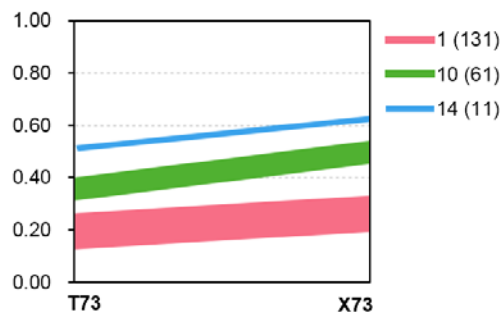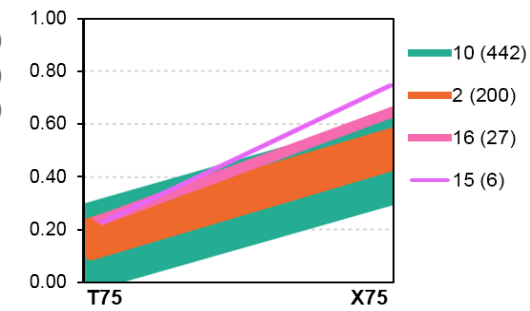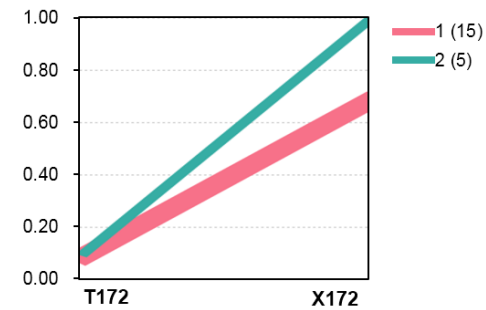



### **Supplementary Figure S1.**

Genomic comparison between matched patient and PDX tumors. **A**, Comparison of somatic mutation allele frequency between matched patient and PDX tumors. The scatterplots demonstrate the distribution of somatic mutation allele frequencies of matched patient and PDX samples (T: patient tumor, X: PDX tumor). Values of Pearson correlation coefficient (R) for each pair were given in each scatterplot. **B**, Comparison of somatic copy number alterations between matched patient and PDX tumors. The plots represent genomic distribution of somatic copy number alterations in matched patient (outer circle; T) and PDX (inner circle; X) tumors. The red region indicates amplification, while the blue region indicates deletion. **C**, Comparison of clonal architecture between matched patient and PDX tumors. Plots shows tumor clonal architecture of matched patient (T) and PDX tumors (X), estimated by PyClone algorithm. Line widths indicate the number of mutations in each cluster (numbers in brackets next to each cluster).

| Patient No. | Patient tissue | PDX Tissue | CEA     |     | CK7     |     | CK20    |     | Ki-67   |     | E-cadherin |     | Vimentin (stroma) |     | CD31    |     | CD3     |     |
|-------------|----------------|------------|---------|-----|---------|-----|---------|-----|---------|-----|------------|-----|-------------------|-----|---------|-----|---------|-----|
|             |                |            | Patient | PDX | Patient | PDX | Patient | PDX | Patient | PDX | Patient    | PDX | Patient           | PDX | Patient | PDX | Patient | PDX |
| #1          | T3             | X3         | 1       | 2   | 0       | 0   | 2       | 3   | 4       | 4   | 2          | 3   | 3                 | 0   | 3       | 0   | 1       | 1   |
| #2          | T25            | X25        | 0       | 0   | 0       | 0   | 2       | 2   | 3       | 4   | 3          | 2   | 3                 | 3   | 3       | 0   | 2       | 3   |
| #5          | T30            | X30        | 2       | 1   | 0       | 0   | 2       | 3   | 4       | 3   | 2          | 2   | 3                 | 1   | 3       | 0   | 3       | 1   |
| #6          | T58            | X58        | 2       | 1   | 1       | 0   | 2       | 3   | 3       | 3   | 3          | 1   | 3                 | 0   | 3       | 0   | 2       | 3   |
| #7          | T16            | X16        | 1       | 1   | 0       | 0   | 1       | 2   | 2       | 3   | 2          | 3   | 3                 | 2   | 3       | 0   | 1       | 3   |
| #10         | T33            | X33        | 2       | 1   | 0       | 0   | 2       | 2   | 3       | 4   | 3          | 1   | 3                 | 3   | 3       | 0   | 2       | 3   |
| #13         | T41            | X41        | 1       | 1   | 0       | 0   | 1       | 1   | 3       | 4   | 2          | 1   | 3                 | 3   | 3       | 0   | 2       | 3   |
| #14         | T49            | X49        | 2       | 1   | 0       | 0   | 2       | 3   | 3       | 3   | 3          | 2   | 3                 | 0   | 3       | 0   | 1       | 3   |
| #17         | T57            | X57        | 1       | 1   | 1       | 1   | 2       | 1   | 4       | 4   | 1          | 1   | 3                 | 3   | 3       | 0   | 2       | 3   |
| #18         | T70            | X70        | 2       | 1   | 0       | 0   | 1       | 2   | 4       | 4   | 3          | 1   | 3                 | 2   | 3       | 1   | 2       | 3   |
| #19         | T73            | X73        | 1       | 1   | 0       | 0   | 2       | 3   | 3       | 3   | 3          | 1   | 3                 | 3   | 3       | 1   | 3       | 3   |
| #21         | T75            | X75        | 2       | 1   | 1       | 1   | 2       | 1   | 4       | 4   | 2          | 1   | 3                 | 3   | 3       | 1   | 2       | 3   |
| #27         | T106           | X106       | 1       | 2   | 0       | 1   | 1       | 2   | 3       | 3   | 2          | 2   | 3                 | 1   | 3       | 0   | 1       | 3   |
| #34         | T167           | X167       | 1       | 1   | 0       | 0   | 1       | 2   | 3       | 3   | 2          | 3   | 3                 | 1   | 3       | 1   | 3       | 3   |
| #35         | T172           | X172       | 2       | 0   | 0       | 0   | 1       | 1   | 2       | 4   | 3          | 1   | 3                 | 0   | 3       | 1   | 1       | 3   |

### Supplementary Figure S2.

Summary of the immunoreactivity scores for CEA, CK7, CK20, Ki-67, E-cadherin, stromal vimentin, CD31 and CD3 in matched patient and PDX tumors.

**A**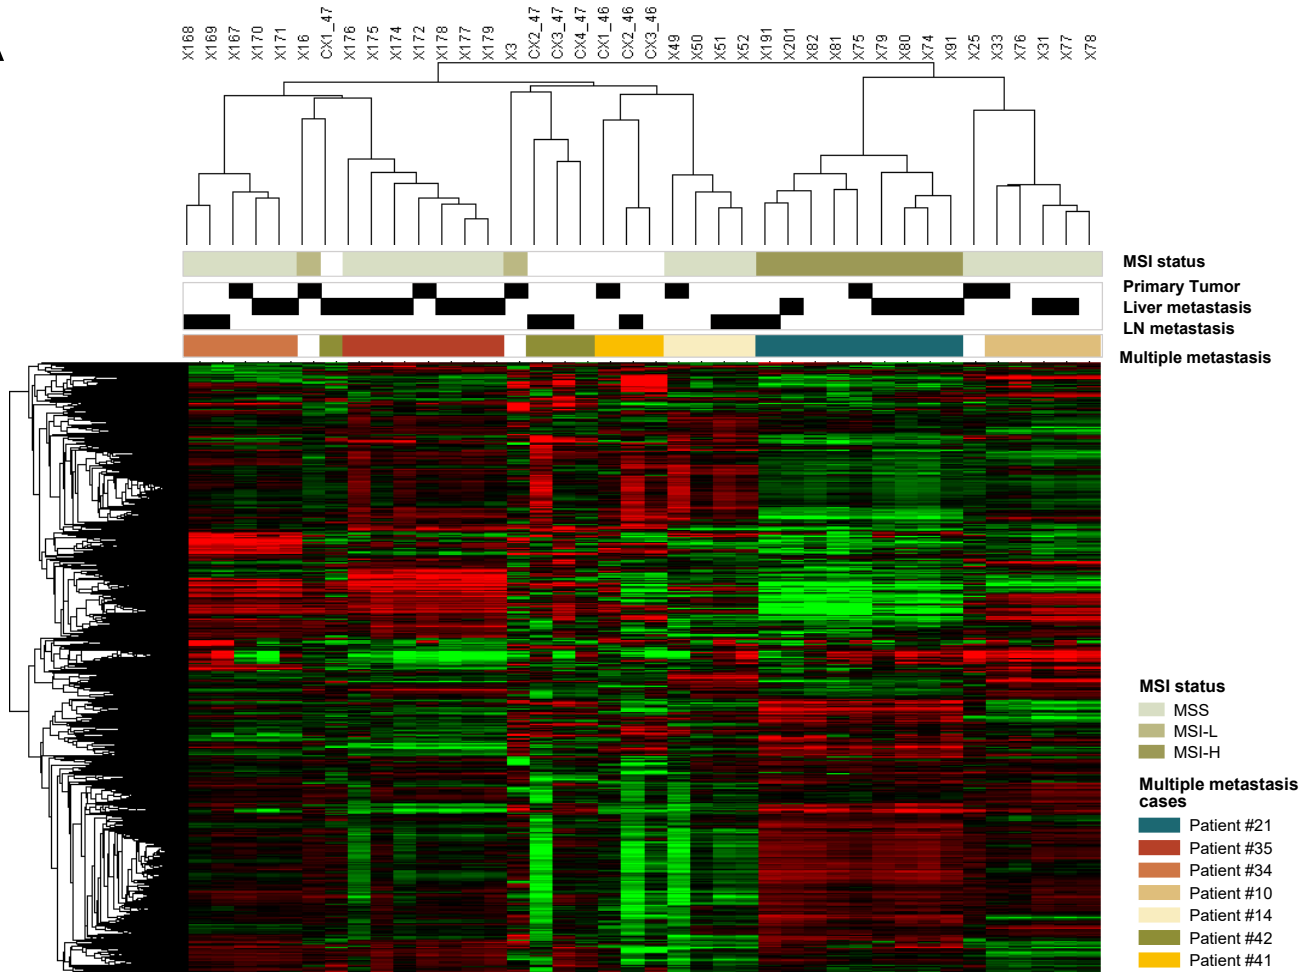**B**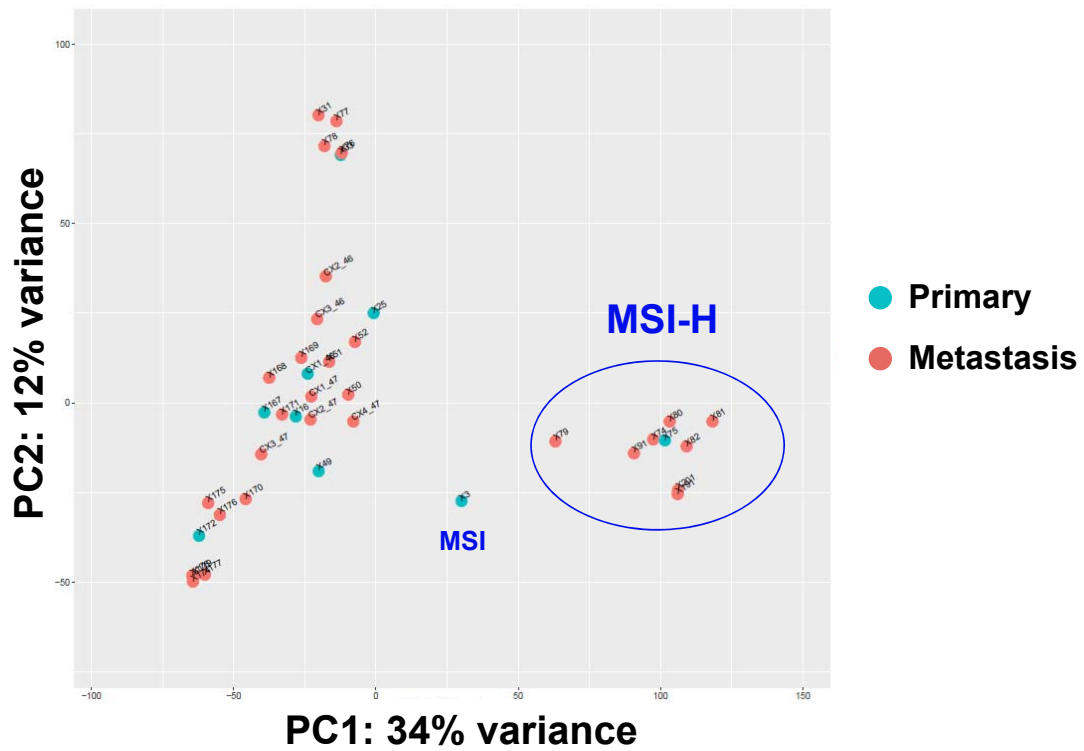

### **Supplementary Figure S3.**

Transcriptomic analysis from RNA-seq data in PDX tumors of CRC patients. **A**, Hierarchical clustering of tumor samples and genes. Heatmap shows the relative expression levels of each gene (rows) in each sample (column), and rows and columns were clustered as pairwise average-linkage with Pearson distance measurement. The first five rows of heatmap designate tumor microsatellite instability (MSI) status, tumor origins (primary or metastasis) and samples from patients with multiple organ metastasis. **B**, Principal component analysis (PCA) from RNA-seq data for PDX tumors of CRC patients. PCA classified samples into two clusters of MSS and MSI-H tumors. Blue dots denote primary tumors and red dots denote metastasis tumors. MSI: microsatellite instable, MSI-H: microsatellite instable-high.

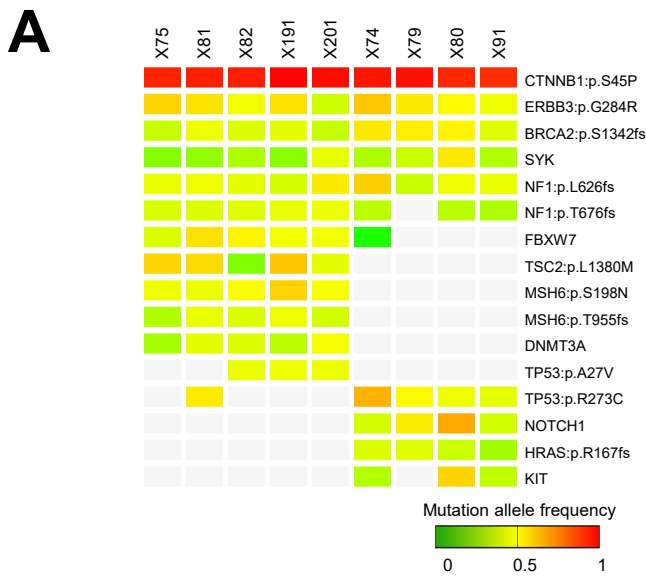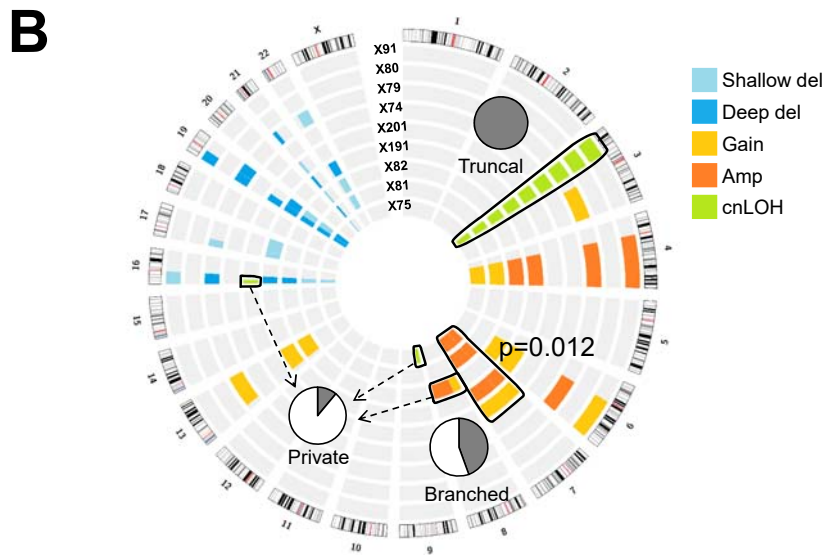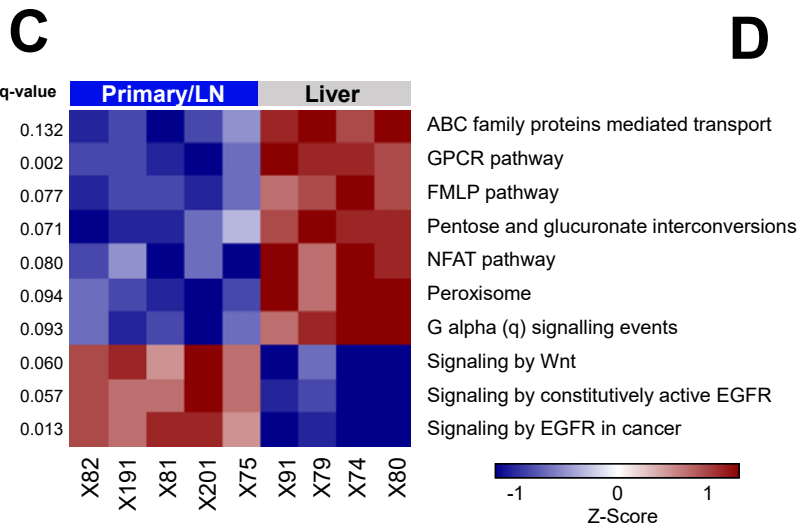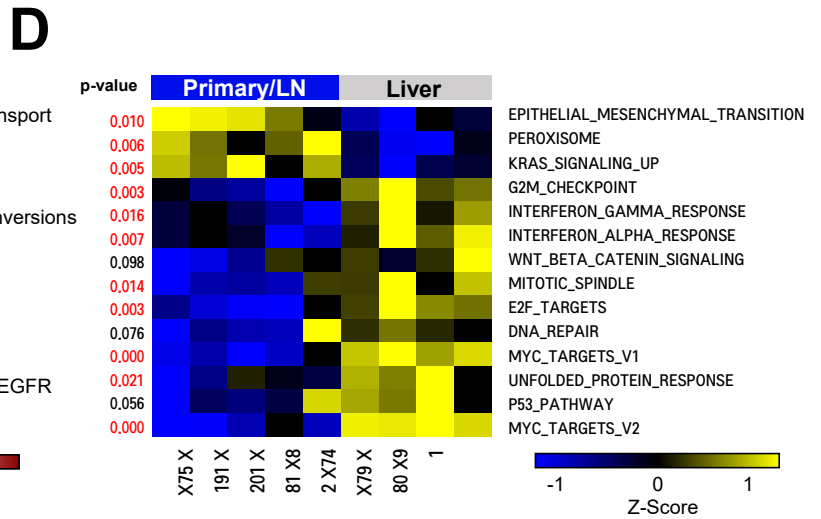

### Supplementary Figure S4.

Genomic and transcriptomic heterogeneity of primary and metastasized tumors from a CRC patient with microsatellite instability-high status. **A**, Regional distribution of somatic mutations on cancer-related genes. Heatmap shows the regional distribution of mutations on cancer-related genes and mutant-allele frequencies. The selection criteria of cancer-related genes are described in Methods. The somatic variants are shown as rows on the heatmap, and the mutant allele frequency of each variant was expressed in color gradient. **B**, Schematic representation of copy number alterations (CNAs). Each color represent each type of CNAs described in legend, and representative examples of truncal, branched and private alterations were depicted in the figure. **C**, Pathway analysis for differentially expressed genes between primary/LN group and liver-metastasized groups. Heatmap shows the relative values of each pathway gene signature (rows) in each sample (column). **D**, Pathway analysis for differentially promoter-methylated genes between primary/LN group and liver-metastasized groups. Heatmap shows the relative values of each pathway gene signature (rows) in each sample (column).

**A**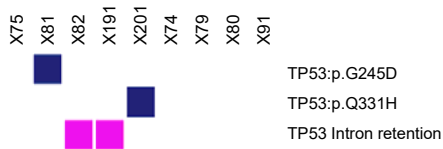**B**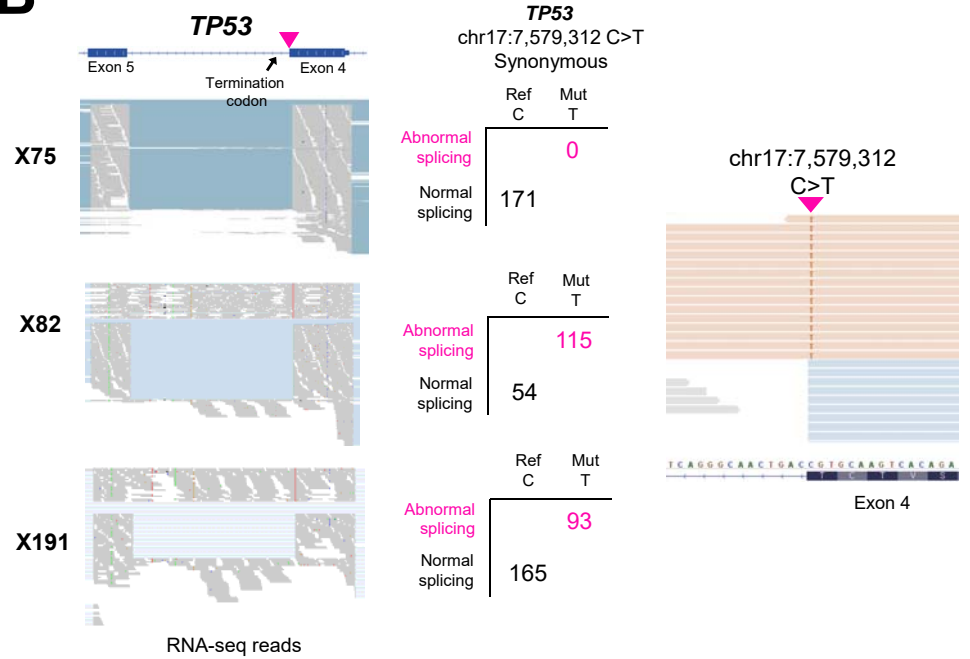**Supplementary Figure S5.**

Convergent bi-allelic inactivation of *TP53* gene in metastatic tumors in lymph node-metastasis group. **A**, Second-hit for bi-allelic *TP53* inactivation in LN tumor group of patient #21. **B**, Synonymous mutation on intron-exon boundary and intron retention of *TP53* in X82 and X191.

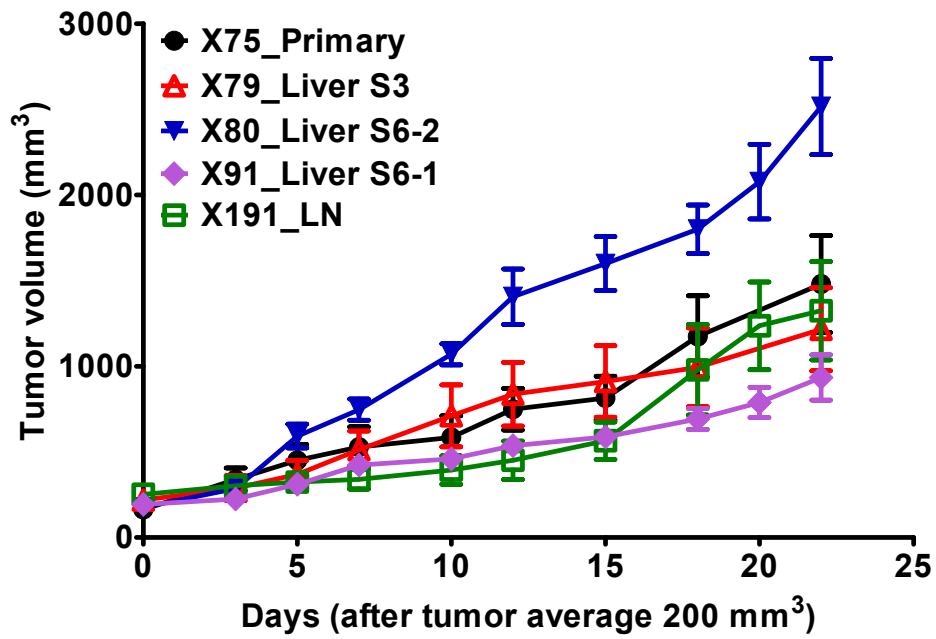

**Supplementary Figure S6.**

Tumor growth curve of PDXs from multiple organ metastasis in patient #21. The graph shows the average tumor size for vehicle-treated mice of each group (n = 5) after the average size of tumors reached 200 mm<sup>3</sup>.

A

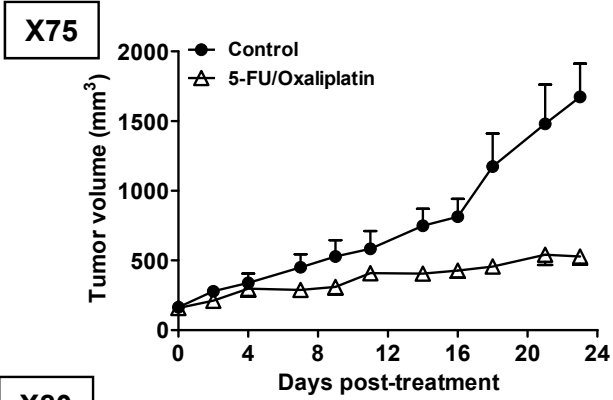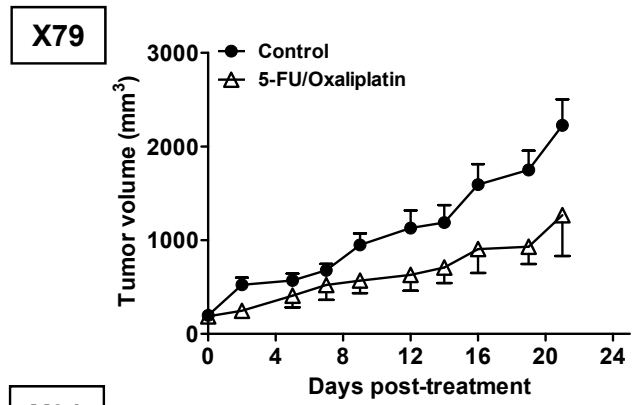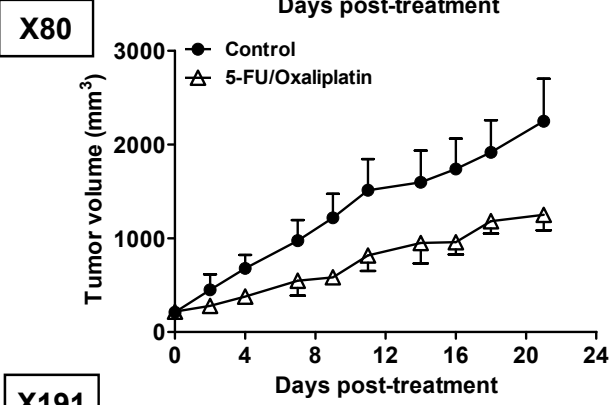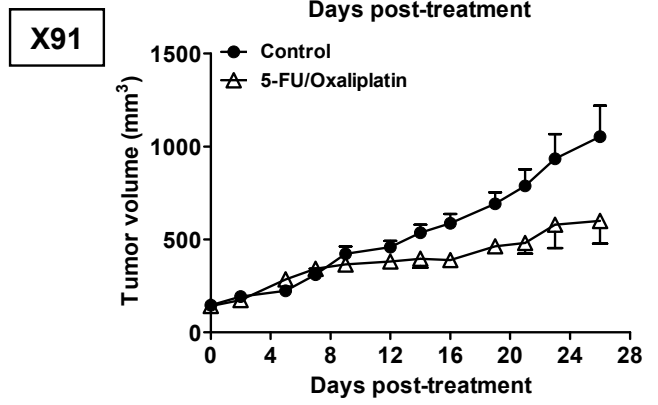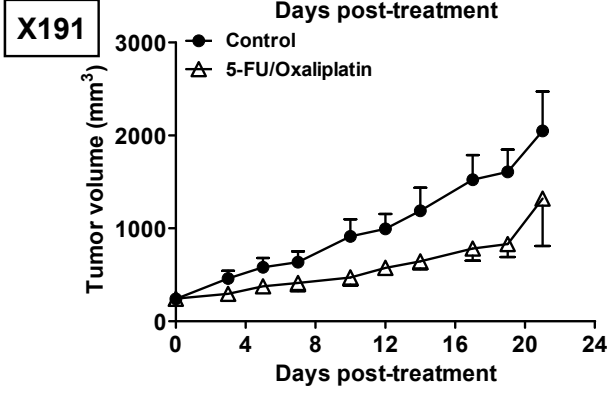



**B**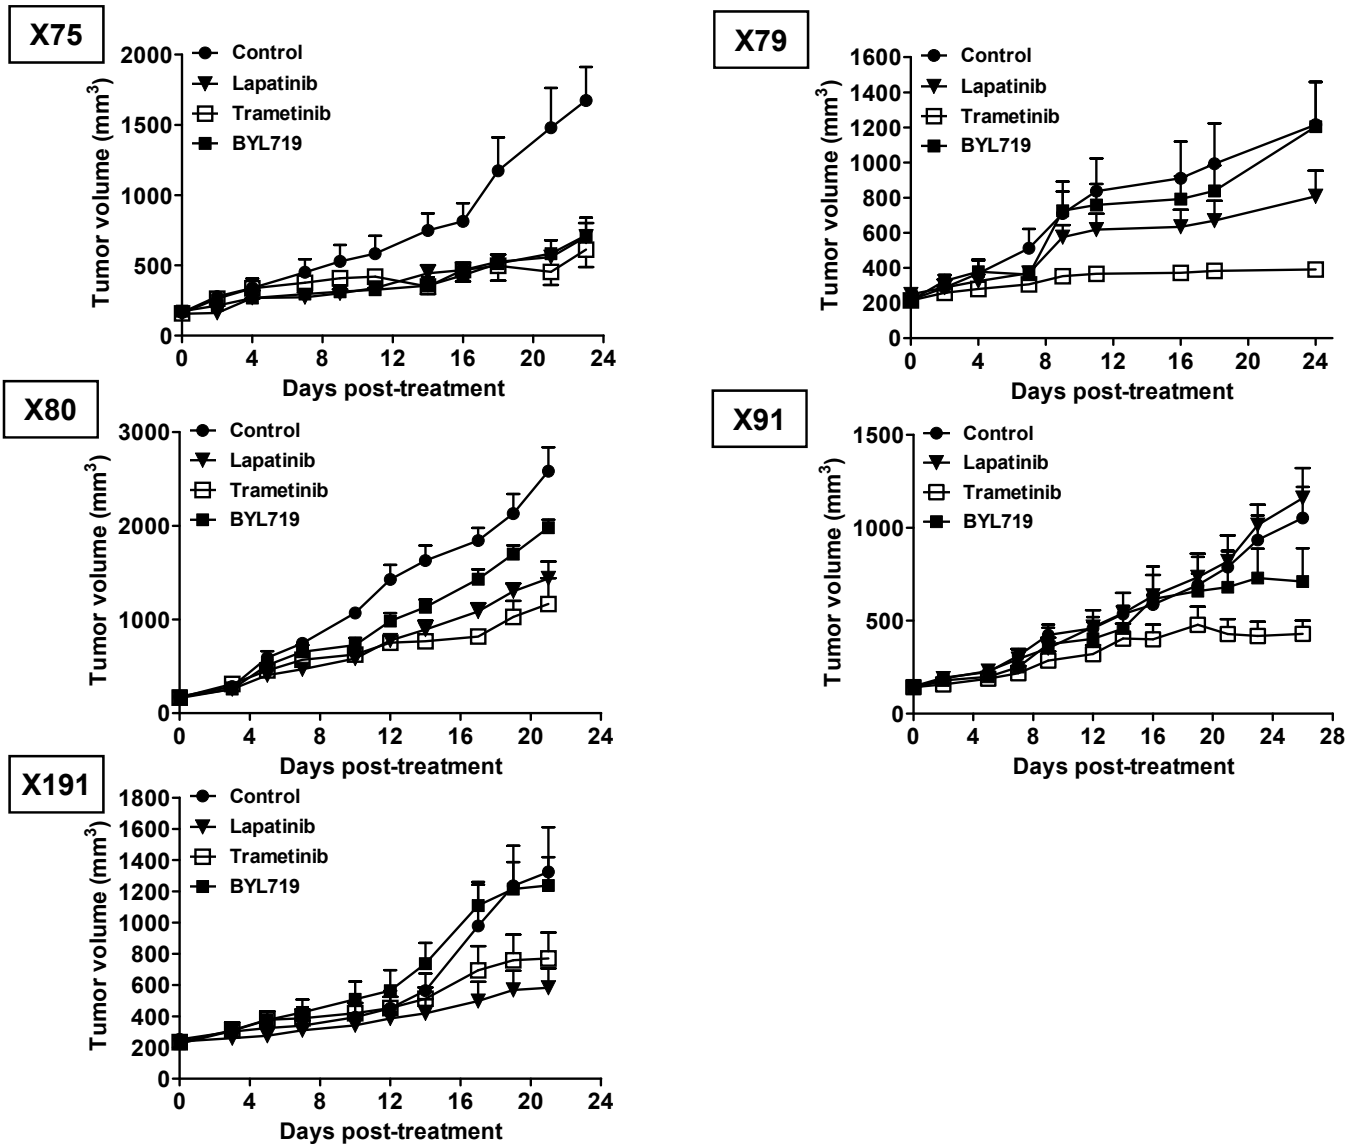**Supplementary Figure S7.**

*In vivo* treatment efficacy in PDX models from multiple organ metastasis of patient #21. **A**, *In vivo* efficacy of 5-FU + oxaliplatin in PDX models from patient #21. Mice with PDXs were treated with vehicle or 5-FU (50 mg/kg/week) + oxaliplatin (5 mg/kg/week) (5-FU/Oxaliplatin) for 21 -26 days depending on sample conditions. Average tumor sizes for each group are plotted. **B**, *In vivo* efficacy of lapatinib, trametinib and BYL719 in PDX models from patient #21. Mice with PDXs were treated with lapatinib (30 mg/kg, twice a day), trametinib (2 mg/kg/day), and BYL719 (25 mg/kg/day) for 21 -26 days depending on sample conditions. Average tumor sizes for each group are plotted.

## ERBB2 L755S

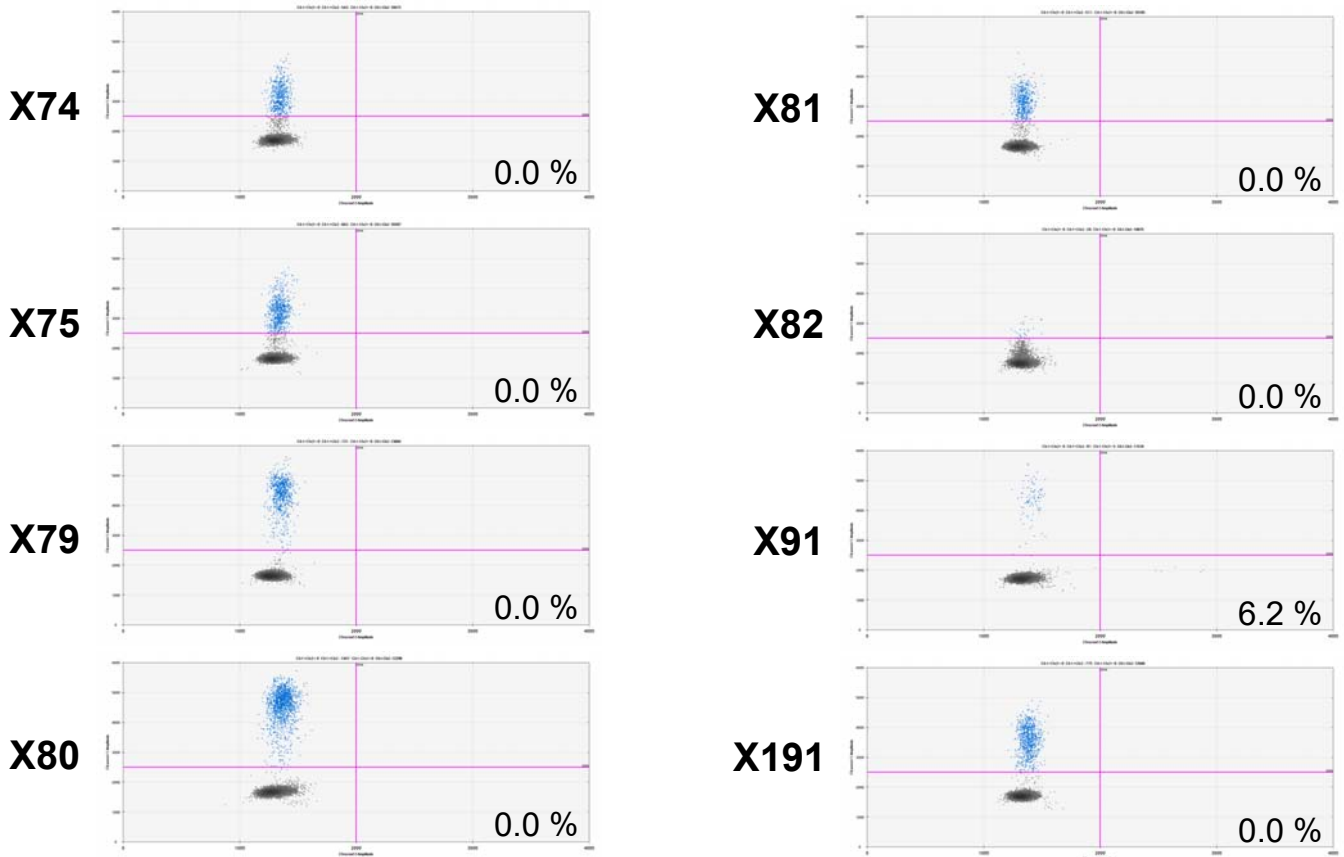

### Supplementary Figure S8.

Detection of ERBB2 L755S mutations using droplet digital PCR (ddPCR). Multiplex ddPCR was performed for wild-type ERBB2 (blue dots) and mutant ERBB2 (L755S; green dots) using tumor DNA from primary and metastasis tumors. The numbers besides the graphs indicate the allele frequency of mutant ERBB2.

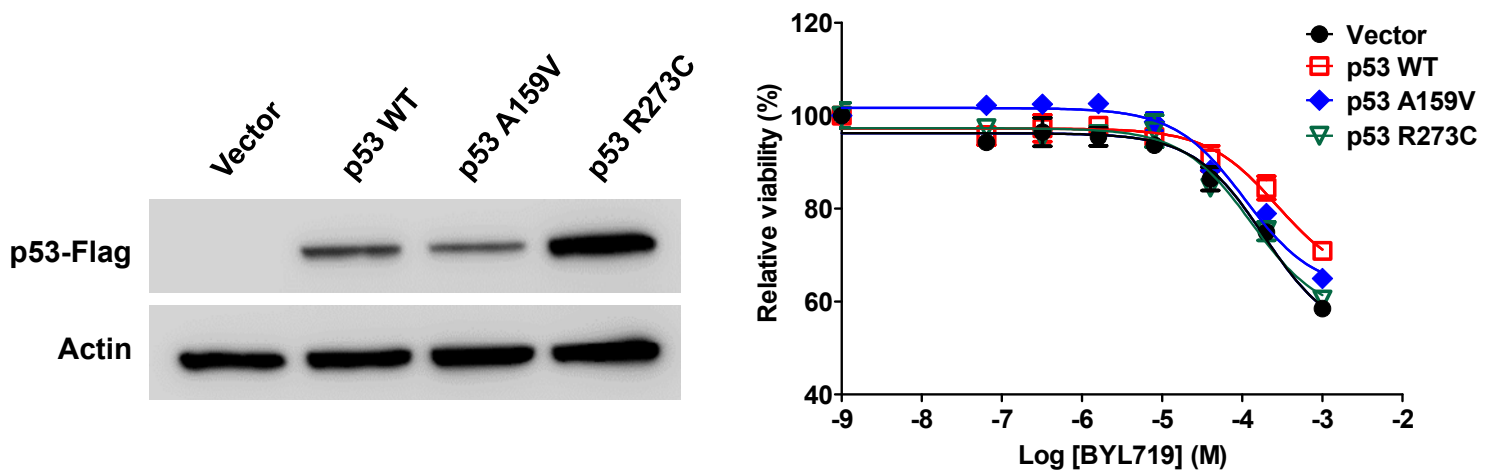

### Supplementary Figure S9.

The effect of *TP53* mutations on sensitivity to a PI3K inhibitor, BYL719, in HEK293 cells. Wild-type (WT) and mutant (A159V, R273C) of *TP53* was over-expressed in HEK293 cells (right panel), and WST assays were used to examine the cytotoxic effect after 72 h treatment of BYL719 in each concentration (left panel).

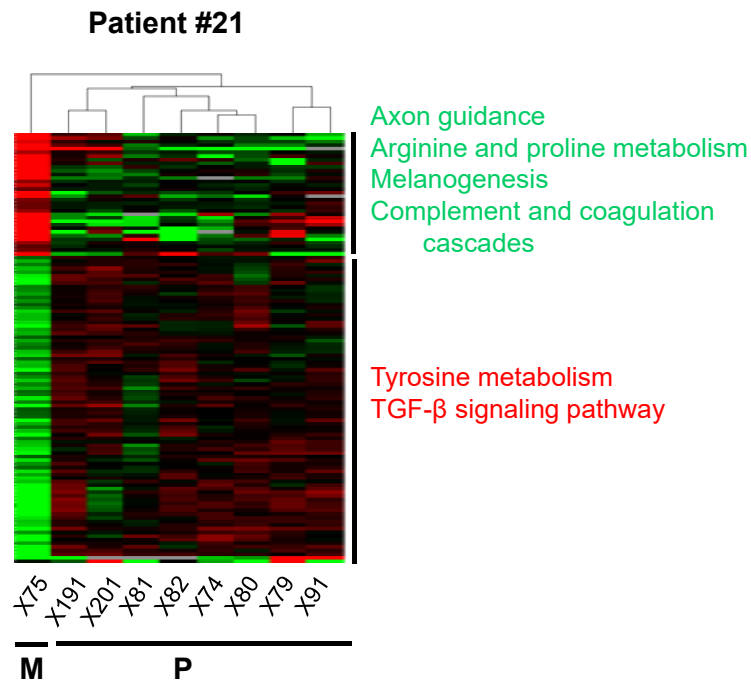

**Supplementary Figure S10.**

Metastasis-specific altered pathways from transcriptomic analysis in PDX tumors of patient #21. Differentially expressed genes (DEGs) between primary and metastasis PDX tumors were hierarchically clustered and illustrated in a heat map (P, primary; M, metastasis). The enriched pathways in DEGs were depicted adjacent to heat map in green letters for primary tumors and red letters for metastasis tumors. Genes with adjusted  $P$ -value  $< 0.05$  were used for pathway analysis.

**Supplementary Table S1.** Clinical information for CRC patients.

| Patient ID | Sex | Age | T stage | N stage | M stage | Stage | MSI status | KRAS 12             | KRAS 13                      | Chemotherapy                    | Chemosensitivity | Recurrence sites             |
|------------|-----|-----|---------|---------|---------|-------|------------|---------------------|------------------------------|---------------------------------|------------------|------------------------------|
| #1         | M   | 47  | 4       | 2       | 1       | IV    | MSI-L      | Wild                | p.G13V<br>(c.38_39GC><br>TT) | FOLFOX                          | PD               | Peritoneal seeding           |
| #2         | F   | 69  | 3       | 1       | 0       | III   | MSS        | Wild                | Wild                         | CCRT (LF)                       | SD               |                              |
| #3         | F   | 79  | 3       | 1       | 0       | III   | MSS        | Wild                | Wild                         | XELODA                          | SD               |                              |
| #4         | M   | 74  | 2       | 2       | 0       | III   | MSS        | Wild                | Wild                         | XELODA                          | SD               |                              |
| #5         | F   | 42  | 2       | 0       | 0       | I     | MSS        | Wild                | Wild                         | No chemo                        | —                |                              |
| #6         | M   | 66  | 3       | 0       | 0       | II    | MSS        | Wild                | p.G13D (c.38<br>G>A)         | XELODA                          | SD               |                              |
| #7         | F   | 87  | 3       | 2       | 0       | III   | MSI-L      | N/A                 | Wild                         | No chemo                        | —                |                              |
| #8         | F   | 85  | 4       | 0       | 0       | II    | MSS        | Wild                | p.G13D (c.38<br>G>A)         | No chemo                        | —                |                              |
| #9         | M   | 66  | 3       | 0       | 0       | II    | MSI-L      | Wild                | Wild                         | No chemo                        | —                |                              |
| #10        | M   | 74  | 4       | 1       | 1       | IV    | MSS        | Wild                | Mutant                       | No chemo                        | —                |                              |
| #11        | F   | 73  | 3       | 0       | 0       | II    | MSS        | Wild                | p.G13D (c.38<br>G>A)         | No chemo                        | —                |                              |
| #12        | M   | 58  | 3       | 0       | 1       | IV    | MSS        | Wild                | Wild                         | FOLFIRI, cetuximab              | SD               |                              |
| #13        | M   | 78  | 3       | 1       | 1       | IV    | MSS        | Wild                | Wild                         | No chemo                        | —                | Liver                        |
| #14        | F   | 54  | 4       | 2       | 1       | IV    | MSS        | Wild                | Wild                         | FOLFIRI, cetuximab →<br>FOLFOX6 | PR → PD          | Liver → LN, ovary,<br>liver  |
| #15        | F   | 81  | 4       | 2       | 1       | IV    | MSS        | p.G12S<br>(c.34G>A) | Wild                         | No chemo                        | PD               | Liver, peritoneal<br>seeding |
| #16        | F   | 55  | 3       | 1       | 1       | IV    | MSS        | Wild                | Wild                         | CCRT (LF) → FOLFOX              | PD → SD          | Liver                        |
| #17        | M   | 40  | 3       | 0       | 0       | II    | MSS        | Wild                | Wild                         | No chemo                        | —                |                              |
| #18        | M   | 50  | 4       | 2       | 0       | III   | MSS        | Wild                | Wild                         | FOLFOX                          | SD               |                              |
| #19        | M   | 69  | 2       | 0       | 0       | I     | MSS        | Wild                | Wild                         | No chemo                        | —                |                              |
| #20        | M   | 58  | 4       | 1       | 1       | IV    | MSS        | Wild                | Wild                         | N/A                             | —                |                              |
| #21        | M   | 48  | 4       | 2       | 1       | IV    | MSI-H      | Wild                | Wild                         | FOLFIRI, cetuximab              | PD               | Liver, adrenal, LN           |
| #22        | M   | 66  | 3       | 0       | 1       | IV    | MSS        | Wild                | Wild                         | FOLFIRI, cetuximab              | SD               |                              |
| #23        | M   | 52  | 4       | 0       | 0       | II    | MSS        | Wild                | Wild                         | CCRT (LF)                       | SD               |                              |

|     |   |    |   |   |   |     |     |                        |      |                            |         |                             |
|-----|---|----|---|---|---|-----|-----|------------------------|------|----------------------------|---------|-----------------------------|
| #24 | F | 88 | 3 | 2 | 1 | IV  | N/A | N/A                    | N/A  | No chemo                   | —       |                             |
| #25 | M | 55 | 4 | 1 | 1 | IV  | MSS | Wild                   | Wild | FOLFIRI, cetuximab         | CR      |                             |
| #26 | F | 65 | — | — | 1 | IV  | MSS | Wild                   | Wild | FOLFIRI, cetuximab         | PR → PD | Liver                       |
| #27 | M | 69 | 3 | 1 | 0 | III | MSS | Wild                   | Wild | XELOX                      | SD      |                             |
| #28 | M | 58 | 3 | 1 | 1 | IV  | MSS | p.G12V<br>(c.35G>T)    | Wild | Avastine, FOLFIRI          | SD      |                             |
| #29 | M | 48 | 3 | 1 | 0 | III | MSS | Wild                   | Wild | XELOX                      | SD      |                             |
| #30 | M | 78 | 4 | 1 | 0 | III | MSS | Wild                   | Wild | Capecitabine               | SD      |                             |
| #31 | M | 79 | 3 | 1 | 0 | III | MSS | Mutant                 | Wild | No chemo                   | —       |                             |
| #32 | F | 83 | 3 | 1 | 1 | IV  | MSS | Mutant                 | Wild | No chemo                   | —       |                             |
| #33 | M | 55 | 3 | 1 | 1 | IV  | MSS | Wild                   | Wild | FOLFIRI, cetuximab         | SD      |                             |
| #34 | M | 60 | 3 | 1 | 1 | IV  | MSS | Mutant                 | Wild | No chemo                   | PD      |                             |
| #35 | F | 51 | 3 | 1 | 1 | IV  | MSS | Mutant                 | Wild | Avastine, FOLFIRI          | PR      |                             |
| #36 | F | 42 | 3 | 0 | 0 | II  | MSS | Mutant                 | Wild | LF                         | SD      |                             |
| #37 | M | 56 | 4 | 1 | 1 | IV  | MSS | Wild                   | Wild | FOLFIRI, cetuximab         | SD      |                             |
| #38 | M | 55 | 3 | 0 | 1 | IV  | MSS | Mutant                 | Wild | Cetuximab → XRT with<br>LF | —       |                             |
| #39 | M | 33 | — | — | — | —   | N/A | N/A                    | N/A  | N/A                        | —       |                             |
| #40 | M | 78 | 3 | 1 | 1 | IV  | MSS | Wild                   | Wild | CCRT (Xeloda)              | —       | Liver                       |
| #41 | M | 67 | — | — | — | —   | MSS | N/A                    | N/A  | N/A                        | —       |                             |
| #42 | M | 55 | — | — | — | —   | MSS | Wild                   | Wild | N/A                        | —       |                             |
| #43 | F | 53 | 4 | 2 | 1 | IV  | MSS | Wild                   | Wild | FOLFIRI                    | PD      | ovary, para-aortic          |
| #44 | F | 51 | 4 | 2 | 1 | IV  | MSS | Wild                   | Wild | Cetuximab + FOLFOX         | CR → PD | Liver, ovary,<br>peritoneum |
| #45 | F | 59 | 3 | 2 | 1 | IV  | MSS | Gly12 Val<br>(c.35G>T) | Wild | Avastine + FOLFOX          | SD → PD | liver                       |
| #46 | M | 73 | 3 | — | — | —   | N/A | —                      | —    | —                          | —       |                             |
| #47 | F | 48 | 3 | 2 | 1 | IV  | MSS | Wild                   | Wild | FOLFOX                     | CR      | ovary                       |

**Supplementary Table S2.** Sample lists for PDX generation and genomic analysis.

| Patient ID | Tumor type | Tumor site      | PDX trial | PDX generation | Patient tumor WES | Patient tumor WES ID | PDX tumor WES | PDX tumor WES ID | PDX tumor RNA-seq | PDX tumor RNA-seq ID | PDX tumor methyl-seq | PDX tumor methyl-seq ID |
|------------|------------|-----------------|-----------|----------------|-------------------|----------------------|---------------|------------------|-------------------|----------------------|----------------------|-------------------------|
| #1         | Primary    | A colon         | V         | V              | V                 | T3                   | V             | X3               | V                 | X3                   |                      |                         |
| #2         | Primary    | Rectum          | V         | V              | V                 | T25                  | V             | X25              | V                 | X25                  |                      |                         |
| #3         | Primary    | S colon         | V         |                |                   |                      |               |                  |                   |                      |                      |                         |
| #4         | Primary    | RS colon        | V         |                |                   |                      |               |                  |                   |                      |                      |                         |
| #5         | Primary    | A colon         | V         | V              | V                 | T30                  | V             | X30              |                   |                      |                      |                         |
| #6         | Primary    | S colon         | V         | V              | V                 | T58                  | V             | X58              |                   |                      |                      |                         |
| #7         | Primary    | S colon         | V         | V              | V                 | T16                  | V             | X16              | V                 | X16                  |                      |                         |
| #8         | Primary    | S colon         | V         | V              |                   |                      | V             | X137             |                   |                      |                      |                         |
| #9         | Primary    | RS colon        | V         |                |                   |                      |               |                  |                   |                      |                      |                         |
| #10        | Primary    | RS colon        | V         | V              | V                 | T33                  | V             | X33              | V                 | X33                  | V                    | X33                     |
|            | Metastatic | Liver S2        | V         | V              | V                 | T31                  | V             | X31              | V                 | X31                  | V                    | X31                     |
|            | Metastatic | Mesenteric      | V         | V              | V                 | T76                  | V             | X76              | V                 | X76                  | V                    | X76                     |
|            | Metastatic | Liver S8        | V         | V              | V                 | T77                  | V             | X77              | V                 | X77                  | V                    | X77                     |
|            | Metastatic | Peritoneum      | V         | V              | V                 | T78                  | V             | X78              | V                 | X78                  | V                    | X78                     |
| #11        | Primary    | A colon         | V         | V              |                   | V                    | X83           |                  |                   |                      |                      |                         |
| #12        | Primary    | S colon         | V         |                | V                 | T159                 |               |                  |                   |                      |                      |                         |
|            | Metastatic | Liver           | V         |                |                   |                      |               |                  |                   |                      |                      |                         |
| #13        | Primary    | Rectum          | V         | V              | V                 | T41                  | V             | X41              |                   |                      |                      |                         |
| #14        | Primary    | Rectum          | V         | V              | V                 | T49                  | V             | X49              | V                 | X49                  | V                    | X49                     |
|            | Metastatic | Ovary           | V         | V              | V                 | T50                  | V             | X50              | V                 | X50                  | V                    | X50                     |
|            | Metastatic | LN (perocolic)  | V         | V              | V                 | T51                  | V             | X51              | V                 | X51                  | V                    | X51                     |
|            | Metastatic | LN (paraaortic) | V         | V              | V                 | T52                  | V             | X52              | V                 | X52                  | V                    | X52                     |
| #15        | Metastatic | Omentum         | V         | V              | V                 | T42                  | V             | X42              |                   |                      |                      |                         |
|            | Metastatic | Peritoneum      | V         | V              | V                 | T56                  | V             | X56              |                   |                      |                      |                         |
| #16        | Metastatic | Liver           | V         | V              | V                 | T43                  | V             | X43              |                   |                      |                      |                         |
| #17        | Primary    | HF colon        | V         | V              | V                 | T57                  | V             | X57              |                   |                      |                      |                         |
| #18        | Primary    | D colon         | V         | V              | V                 | T70                  | V             | X70              |                   |                      |                      |                         |
|            | Metastatic | LN              | V         |                | V                 | T190                 |               |                  |                   |                      |                      |                         |
| #19        | Primary    | HF colon        | V         | V              | V                 | T73                  | V             | X73              |                   |                      |                      |                         |
|            | Metastatic | Stomach         | V         |                | V                 | T189                 |               |                  |                   |                      |                      |                         |
| #20        | Primary    | S colon         | V         |                |                   |                      |               |                  |                   |                      |                      |                         |
|            | Metastatic | Liver           | V         | V              | V                 | T146                 |               |                  |                   |                      |                      |                         |
| #21        | Primary    | A colon         | V         | V              | V                 | T75                  | V             | X75              | V                 | X75                  | V                    | X75                     |
|            | Metastatic | LN              | V         | V              | V                 | T191                 | V             | X191             | V                 | X191                 | V                    | X191                    |
|            | Metastatic | Liver S3        | V         | V              | V                 | T79                  | V             | X79              | V                 | X79                  | V                    | X79                     |
|            | Metastatic | Liver S6-1      | V         | V              | V                 | T91                  | V             | X91              | V                 | X91                  | V                    | X91                     |
|            | Metastatic | Liver S6-2      | V         | V              | V                 | T80                  | V             | X80              | V                 | X80                  | V                    | X80                     |
|            | Metastatic | Liver S8        | V         | V              | V                 | T74                  | V             | X74              | V                 | X74                  | V                    | X74                     |
|            | Metastatic | Omentum         | V         | V              | V                 | T81                  | V             | X81              | V                 | X81                  | V                    | X81                     |

|            |            |                |   |   |      |      |      |       |      |      |   |      |
|------------|------------|----------------|---|---|------|------|------|-------|------|------|---|------|
|            | Metastatic | Mesenteric     | V | V | V    | T82  | V    | X82   | V    | X82  | V | X82  |
|            | Metastatic | Liver          | V | V |      |      | V    | X201  | V    | X201 | V | X201 |
| #22        | Primary    | D colon        | V | V |      |      | V    | X147  |      |      |   |      |
| #23        | Primary    | Rectum         | V | V |      |      | V    | X109  |      |      |   |      |
| #24        | Primary    | Rectum         | V |   |      |      |      |       |      |      |   |      |
|            | Metastatic | LN             | V |   | V    | T188 |      |       |      |      |   |      |
| #25        | Primary    | RS colon       | V |   | V    | T161 |      |       |      |      |   |      |
|            | Metastatic | LN             | V |   | V    | T162 |      |       |      |      |   |      |
| #26        | Primary    | A colon        | V | V | V    | T149 |      |       |      |      |   |      |
|            | Metastatic | LN             | V |   |      |      |      |       |      |      |   |      |
|            | Metastatic | Mesenteric     | V |   | V    | T187 |      |       |      |      |   |      |
| #27        | Metastatic | Omentum        | V | V | V    | T143 |      |       |      |      |   |      |
|            | Primary    | S colon        | V | V | V    | T106 | V    | X106  |      |      |   |      |
|            | Metastatic | Stomach        | V | V | V    | T186 |      |       |      |      |   |      |
| #28        | Primary    | S colon        | V | V | V    | T185 |      |       |      |      |   |      |
|            | Metastatic | Liver          | V | V | V    | T140 |      |       |      |      |   |      |
| #29        | Primary    | RS colon       | V | V | V    | T155 |      |       |      |      |   |      |
|            | Metastatic | LN             | V |   | V    | T184 |      |       |      |      |   |      |
| #30        | Primary    | HF colon       | V |   | V    | T163 |      |       |      |      |   |      |
|            | Metastatic | LN             | V |   | V    | T164 |      |       |      |      |   |      |
| #31        | Primary    | RS colon       | V | V | V    | T165 |      |       |      |      |   |      |
|            | Metastatic | LN             | V | V | V    | T166 |      |       |      |      |   |      |
| #32        | Primary    | S colon        | V | V | V    | T153 |      |       |      |      |   |      |
|            | Metastatic | Liver          | V |   | V    | T181 |      |       |      |      |   |      |
|            | Metastatic | LN             | V | V | V    | T182 |      |       |      |      |   |      |
| #33        | Primary    | S colon        | V | V | V    | T154 |      |       |      |      |   |      |
|            | Metastatic | Liver          | V | V | V    | T180 |      |       |      |      |   |      |
| #34        | Primary    | A colon        | V | V | V    | T167 | V    | X167  | V    | X167 |   |      |
|            | Metastatic | LN (SMV)       | V | V | V    | T168 | V    | X168  | V    | X168 |   |      |
|            | Metastatic | LN (pericolic) | V | V | V    | T169 | V    | X169  | V    | X169 |   |      |
|            | Metastatic | Liver S2       | V | V | V    | T170 | V    | X170  | V    | X170 |   |      |
|            | Metastatic | Liver S4       | V | V | V    | T171 | V    | X171  | V    | X171 |   |      |
| #35        | Primary    | Rectum         | V | V | V    | T172 | V    | X172  | V    | X172 |   |      |
|            | Metastatic | Liver S2       | V |   | V    | T173 |      |       |      |      |   |      |
|            | Metastatic | Liver S2-2     | V | V |      |      | V    | X174  | V    | X174 |   |      |
|            | Metastatic | Liver S6       | V | V | V    | T175 | V    | X175  | V    | X175 |   |      |
|            | Metastatic | Liver S7       | V | V | V    | T176 | V    | X176  | V    | X176 |   |      |
|            | Metastatic | Liver S8       | V | V | V    | T177 | V    | X177  | V    | X177 |   |      |
|            | Metastatic | Liver S5/6     | V | V | V    | T178 | V    | X178  | V    | X178 |   |      |
| Metastatic | Liver S6-3 | V              | V | V | T179 | V    | X179 | V     | X179 |      |   |      |
| #36        | Primary    | RS colon       | V | V |      |      |      |       |      |      |   |      |
| #37        | Primary    | RS colon       | V | V |      |      |      |       |      |      |   |      |
|            | Metastatic | LN             | V |   |      |      |      |       |      |      |   |      |
| #38        | Metastatic | Liver          | V | V |      |      |      |       |      |      |   |      |
| #39        | Primary    | Colon (FAP)    | V | V |      |      | V    | CX 43 |      |      |   |      |



|     |            |                    |   |   |   |         |   |        |
|-----|------------|--------------------|---|---|---|---------|---|--------|
| #40 | Primary    | Rectum             | V |   |   |         |   |        |
|     | Metastatic | Liver              | V | V |   |         |   |        |
| #41 | Primary    | Rectum             | V | V | V | CX1_46  | V | CX1_46 |
|     | Metastatic | LN                 | V | V | V | CX2_46  | V | CX2_46 |
|     | Metastatic | Peritoneum         | V | V | V | CX3_46  | V | CX3_46 |
|     | Metastatic | Lung               | V |   |   |         |   |        |
| #42 | Metastatic | Liver              | V | V | V | CX1_47  | V | CX1_47 |
|     | Metastatic | N (peripancreatic) | V | V | V | CX2_47  | V | CX2_47 |
|     | Metastatic | LN (pericolic)     | V | V | V | CX3_47  | V | CX3_47 |
|     | Metastatic | LN (paraortic)     | V |   |   |         |   |        |
|     | Metastatic | Omentum            | V | V | V | CX4_47  | V | CX4_47 |
| #43 | Primary    | S colon            |   |   | V | CT_101  |   |        |
|     | Metastatic | Ovary              |   |   | V | COv_101 |   |        |
| #44 | Primary    | S colon            |   |   | V | CT_102  |   |        |
|     | Metastatic | Ovary              |   |   | V | COv_102 |   |        |
| #45 | Primary    | A colon            |   |   | V | CT_103  |   |        |
|     | Metastatic | Ovary              |   |   | V | COv_103 |   |        |
| #46 | Primary    | Colon              |   |   | V | CT_104  |   |        |
|     | Metastatic | Ovary              |   |   | V | COv_104 |   |        |
| #47 | Primary    | S colon            |   |   | V | CT_105  |   |        |
|     | Metastatic | Ovary              |   |   | V | COv_105 |   |        |

\* A colon - ascending colon, HF colon - hepatic flexure colon, T colon -transverse colon, D colon - descending colon, S colon - sigmoid colon, RS colon - rectosigmoid colon

**Supplementary Table S3.** Summary of PDX engraftment rates.

|                                  | <b>PDX trial</b> | <b>PDX generation</b> | <b>PDX engraftment rate (%)</b> | <b>P-value</b> |
|----------------------------------|------------------|-----------------------|---------------------------------|----------------|
| <b>Primary</b>                   | <b>38</b>        | <b>29</b>             | <b>76.3</b>                     |                |
| <b>(1) Primary tumor site</b>    |                  |                       |                                 |                |
| A colon                          | 6                | 6                     | 100.0                           | 0.5362         |
| D colon                          | 2                | 2                     | 100.0                           |                |
| HF colon                         | 3                | 2                     | 66.7                            |                |
| Rectum                           | 8                | 6                     | 75.0                            |                |
| RS colon                         | 8                | 5                     | 62.5                            |                |
| S colon                          | 10               | 7                     | 70.0                            |                |
| Colon (total)                    | 1                | 1                     | 100.0                           |                |
| <b>(2) Tumor stage</b>           |                  |                       |                                 |                |
| I                                | 2                | 2                     | 100.0                           | 0.8815         |
| II                               | 7                | 6                     | 85.7                            |                |
| III                              | 9                | 6                     | 66.7                            |                |
| IV                               | 18               | 13                    | 72.2                            |                |
| N/A                              | 2                | 2                     | 100.0                           |                |
| <b>(3) MSI status</b>            |                  |                       |                                 |                |
| MSS                              | 32               | 25                    | 78.1                            | 1              |
| MSI                              | 4                | 3                     | 75.0                            |                |
| N/A                              | 2                | 1                     | 50.0                            |                |
| <b>Metastasis</b>                | <b>57</b>        | <b>43</b>             | <b>75.4</b>                     |                |
| <b>(1) Metastasis sites</b>      |                  |                       |                                 |                |
| Liver                            | 25               | 22                    | 88.0                            | 0.5954         |
| LN                               | 18               | 10                    | 55.6                            |                |
| Omentum/peritoneum/<br>Mesentery | 10               | 9                     | 90.0                            |                |
| Ovary                            | 1                | 1                     | 100.0                           |                |
| Lung                             | 1                | 0                     | 0.0                             |                |
| Stomach                          | 2                | 1                     | 50.0                            |                |



|             | cluster_id (size) | Average changes upon metastasis in pt | Average changes upon metastasis in pdx | Average changes upon engraftment | T172 | T173 | T175 | T176 | T177 | T178 | T179 | X172 | X174 | X175 | X176 | X177 | X178 | X179 |
|-------------|-------------------|---------------------------------------|----------------------------------------|----------------------------------|------|------|------|------|------|------|------|------|------|------|------|------|------|------|
| Patient #35 | 1 (15)            | 0.064                                 | 0.004                                  | 0.537                            | 0.09 | 0.10 | 0.11 | 0.19 | 0.26 | 0.15 | 0.13 | 0.68 | 0.62 | 0.63 | 0.65 | 0.52 | 0.69 | 0.99 |
|             | 2 (5)             | 0.149                                 | 0.007                                  | 0.764                            | 0.10 | 0.11 | 0.14 | 0.38 | 0.44 | 0.22 | 0.22 | 0.99 | 1.00 | 0.98 | 0.99 | 1.00 | 1.00 | 1.00 |
|             |                   | <b>0.107</b>                          | <b>0.006</b>                           | <b>0.650</b>                     |      |      |      |      |      |      |      |      |      |      |      |      |      |      |

|             | cluster_id (size) | Average changes upon metastasis in pt | T153 | T181 | T182 |
|-------------|-------------------|---------------------------------------|------|------|------|
| Patient #26 | 10 (99)           | -0.032                                | 0.40 | 0.37 | 0.36 |
|             | 4 (12)            | -0.112                                | 0.69 | 0.59 | 0.58 |
|             | 1 (7)             | -0.097                                | 0.86 | 0.78 | 0.75 |
|             |                   | <b>-0.080</b>                         |      |      |      |

|             | cluster_id (size) | Average changes upon metastasis in pt | T149 | T143 | T187 |
|-------------|-------------------|---------------------------------------|------|------|------|
| Patient #32 | 1 (70)            | 0.008                                 | 0.23 | 0.22 | 0.26 |
|             | 6 (55)            | 0.025                                 | 0.40 | 0.39 | 0.45 |
|             | 5 (9)             | 0.008                                 | 0.55 | 0.56 | 0.56 |
|             |                   | <b>0.014</b>                          |      |      |      |

|             | cluster_id (size) | Average changes upon metastasis in pdx | CX1_46 | CX2_46 | CX3_46 |
|-------------|-------------------|----------------------------------------|--------|--------|--------|
| Patient #41 | 5 (44)            | 0.156                                  | 0.49   | 0.66   | 0.64   |
|             | 9 (26)            | -0.071                                 | 0.53   | 0.45   | 0.47   |
|             | 2 (21)            | 0.017                                  | 0.98   | 0.99   | 1.00   |
|             | 7 (12)            | -0.080                                 | 0.40   | 0.27   | 0.37   |
|             |                   | <b>0.005</b>                           |        |        |        |

|                | cluster_i<br>d (size) | Average changes in<br>pdx | CX1_47 | CX2_47 | CX3_47 | CX4_47 |
|----------------|-----------------------|---------------------------|--------|--------|--------|--------|
| Patient<br>#42 | 13 (54)               | -0.019                    | 0.63   | 0.61   | 0.62   | 0.58   |
|                | 3 (42)                | 0.056                     | 0.40   | 0.43   | 0.49   | 0.45   |
|                | 17 (32)               | -0.361                    | 0.97   | 0.64   | 0.59   | 0.59   |
|                | 9 (19)                | -0.277                    | 0.66   | 0.42   | 0.38   | 0.36   |
|                | 2 (9)                 | 0.010                     | 0.93   | 0.97   | 1.00   | 0.85   |
|                |                       | <b>-0.118</b>             |        |        |        |        |

|               | cluster_i<br>d (size) | Average changes in<br>pdx | T16  | X16  |
|---------------|-----------------------|---------------------------|------|------|
| Patient<br>#7 | 1 (104)               | 0.166                     | 0.32 | 0.49 |

|               | cluster_i<br>d (size) | Average changes in<br>pdx | T25  | X25  |
|---------------|-----------------------|---------------------------|------|------|
| Patient<br>#2 | 3 (67)                | 0.218                     | 0.24 | 0.45 |

|               | cluster_i<br>d (size) | Average changes in<br>pdx | T30  | X30  |
|---------------|-----------------------|---------------------------|------|------|
| Patient<br>#5 | 2 (205)               | 0.094                     | 0.24 | 0.33 |
|               | 18 (21)               | 0.154                     | 0.34 | 0.50 |
|               | 15 (15)               | 0.242                     | 0.43 | 0.67 |
|               | 5 (8)                 | 0.201                     | 0.27 | 0.47 |
|               | 1 (7)                 | -0.013                    | 0.12 | 0.10 |
|               |                       | <b>0.136</b>              |      |      |

|                | cluster_i<br>d (size) | Average changes in<br>pdx | T41  | X41  |
|----------------|-----------------------|---------------------------|------|------|
| Patient<br>#13 | 7 (105)               | 0.335                     | 0.17 | 0.50 |
|                | 1 (14)                | 0.685                     | 0.29 | 0.97 |
|                | 6 (5)                 | 0.045                     | 0.11 | 0.16 |
|                |                       | <b>0.355</b>              |      |      |

|              | cluster_i | Average changes in | T58  | X58  |
|--------------|-----------|--------------------|------|------|
|              | d (size)  | pdx                |      |      |
| Patient #6   | 4 (129)   | 0.166              | 0.34 | 0.50 |
|              | 2 (28)    | 0.456              | 0.53 | 0.99 |
|              | 1 (5)     | -0.009             | 0.14 | 0.13 |
| <b>0.204</b> |           |                    |      |      |

|              |        | Average changes in | T43  | X43  |
|--------------|--------|--------------------|------|------|
|              |        | pdx                |      |      |
| Patient #16  | 3 (93) | 0.101              | 0.40 | 0.51 |
|              | 2 (9)  | 0.233              | 0.77 | 1.00 |
| <b>0.167</b> |        |                    |      |      |

**Supplementary Table S5.** The ratio of truncal, branched and private mutations in each MOM case.

| <b>Patient</b> | <b>Truncal</b> | <b>Branched</b> | <b>Private</b> | <b>Total</b> | <b>Truncal (%)</b> | <b>Branched (%)</b> | <b>Private (%)</b> |
|----------------|----------------|-----------------|----------------|--------------|--------------------|---------------------|--------------------|
| Patient #10    | 84             | 30              | 101            | 215          | 39.1%              | 14.0%               | 47.0%              |
| Patient #14    | 48             | 19              | 95             | 162          | 29.6%              | 11.7%               | 58.6%              |
| Patient #21    | 831            | 1,048           | 3,296          | 5,175        | 16.1%              | 20.3%               | 63.7%              |
| Patient #34    | 72             | 50              | 71             | 193          | 37.3%              | 25.9%               | 36.8%              |
| Patient #35    | 83             | 26              | 162            | 271          | 30.6%              | 9.6%                | 59.8%              |
| <b>Average</b> |                |                 |                |              | 30.5%              | 16.3%               | 53.2%              |
| <b>Minimum</b> |                |                 |                |              | 16.1%              | 9.6%                | 36.8%              |
| <b>Maximum</b> |                |                 |                |              | 39.1%              | 25.9%               | 63.7%              |

**Supplementary Table S6.** Summary of mutations in ERBB3, ERBB2, NF1 and PIK3CA genes from patient #21.

| Gene          | Genomic location | Amino acid change                    | Cosmic 70 | X75<br>Primary | X74<br>Liver (8) | X79<br>Liver (3) | X80<br>Liver (6-2) | X91<br>Liver (6-1) | X81<br>Omentum | X82<br>Mesenteric | X191<br>Lymph node | X201<br>Liver (recur) | Drug       |
|---------------|------------------|--------------------------------------|-----------|----------------|------------------|------------------|--------------------|--------------------|----------------|-------------------|--------------------|-----------------------|------------|
| <i>ERBB3</i>  | 12:56481922      | NM_001982:exon7:c.G850A:p.G284R      | V         | V              | V                | V                | V                  | V                  | V              | V                 | V                  | V                     | Lapatinib  |
| <i>ERBB2</i>  | 17:37880220      | NM_001289937:exon19:c.T264C:p.L755S  | V         |                |                  |                  |                    | V                  |                |                   |                    |                       |            |
| <i>NF1</i>    | 17:29552144      | NM_000267:exon17:c.1877delT:p.L626fs |           | V              | V                | V                | V                  | V                  | V              | V                 | V                  | V                     | Trametinib |
|               | 17:29553478      | NM_000267:exon18:c.2027delC:p.T676fs | V         | V              | V                |                  | V                  | V                  | V              | V                 | V                  | V                     |            |
|               | 17:29553485      | NM_000267:exon18:c.2034delG:p.P678fs |           |                |                  | V                |                    |                    |                |                   |                    |                       |            |
| <i>PIK3CA</i> | 3:178936092      | NM_006218:exon10:c.A1634C:p.E545A    | V         |                |                  |                  | V                  |                    |                |                   |                    |                       | BYL719     |
|               | 3:178937422      | NM_006218:exon12:c.T1810C:p.C604R    | V         |                |                  | V                |                    |                    |                |                   |                    |                       |            |
| <i>TP53</i>   | 17:7576853       | NM_000546:exon9:c.G993T:p.Q331H      | V         |                |                  |                  |                    |                    |                |                   |                    | V                     |            |
|               | 17:7577121       | NM_000546:exon8:c.C817T:p.R273C      | V         |                | V                | V                | V                  | V                  | V              |                   |                    |                       |            |
|               | 17:7577547       | NM_000546:exon7:c.G734A:p.G245D      | V         |                |                  |                  |                    |                    | V              |                   |                    |                       |            |
|               | 17:7578454       | NM_000546:exon5:c.C476T:p.A159V      | V         |                |                  |                  |                    |                    |                | V                 | V                  | V                     |            |
